# Supplementary material
Source: PubMed Central journal article supplement (PMC4729303)
Supplement: NIHMS663082-supplement-Suppl_Legends.pdf [file NIHMS663082-supplement-Suppl_Legends.pdf]

**Supplementary Figure 1:**

Summary of oligonucleotide array CGH analysis of 31 cases. Copy number increases are shown in red, decreases in green. Sites suggestive of CNV are indicated as thin lines in light green or red. Numbers below the graph refer to chromosomes. Frequency values are displayed as percentages.

**Supplementary Figure 2:**

Summary of oligonucleotide array CGH analysis of 16 cases of UICC III tumors (A), and 15 cases of UICC II tumors (B). Copy number increases are shown in red, decreases in green. Sites suggestive of CNV are indicated as thin lines in light green or red. Numbers below the graph refer to chromosomes. Average values are displayed in log<sub>2</sub> ratios.
