# Supplementary material
Source: PubMed Central journal article supplement (PMC4729303)

Summary plot from allSamples

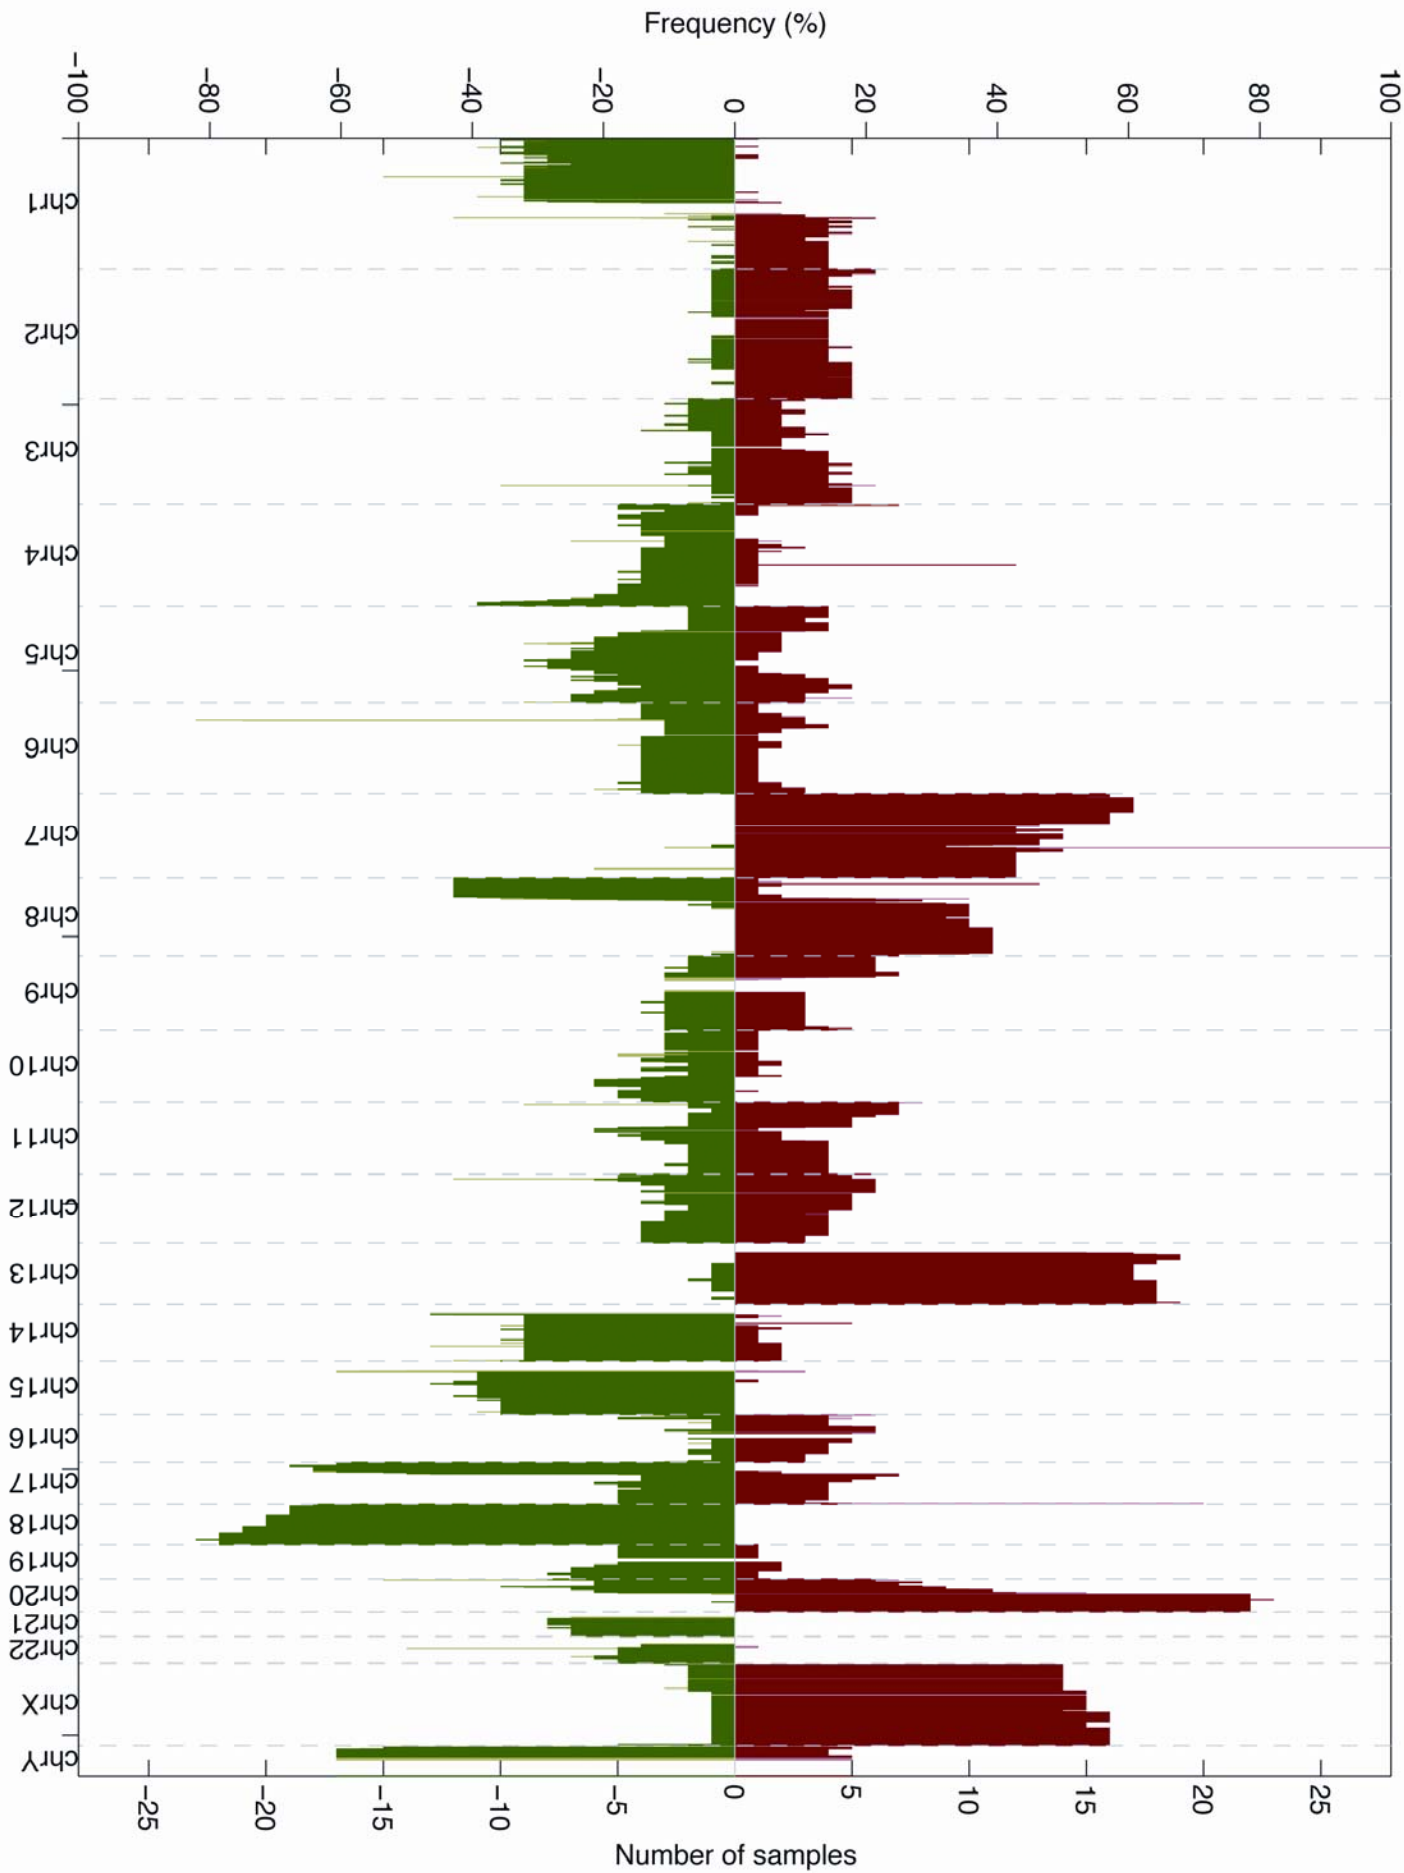

Supplement: NIHMS663082-supplement-Suppl_Fig_1.pdf [file NIHMS663082-supplement-Suppl_Fig_1.pdf]

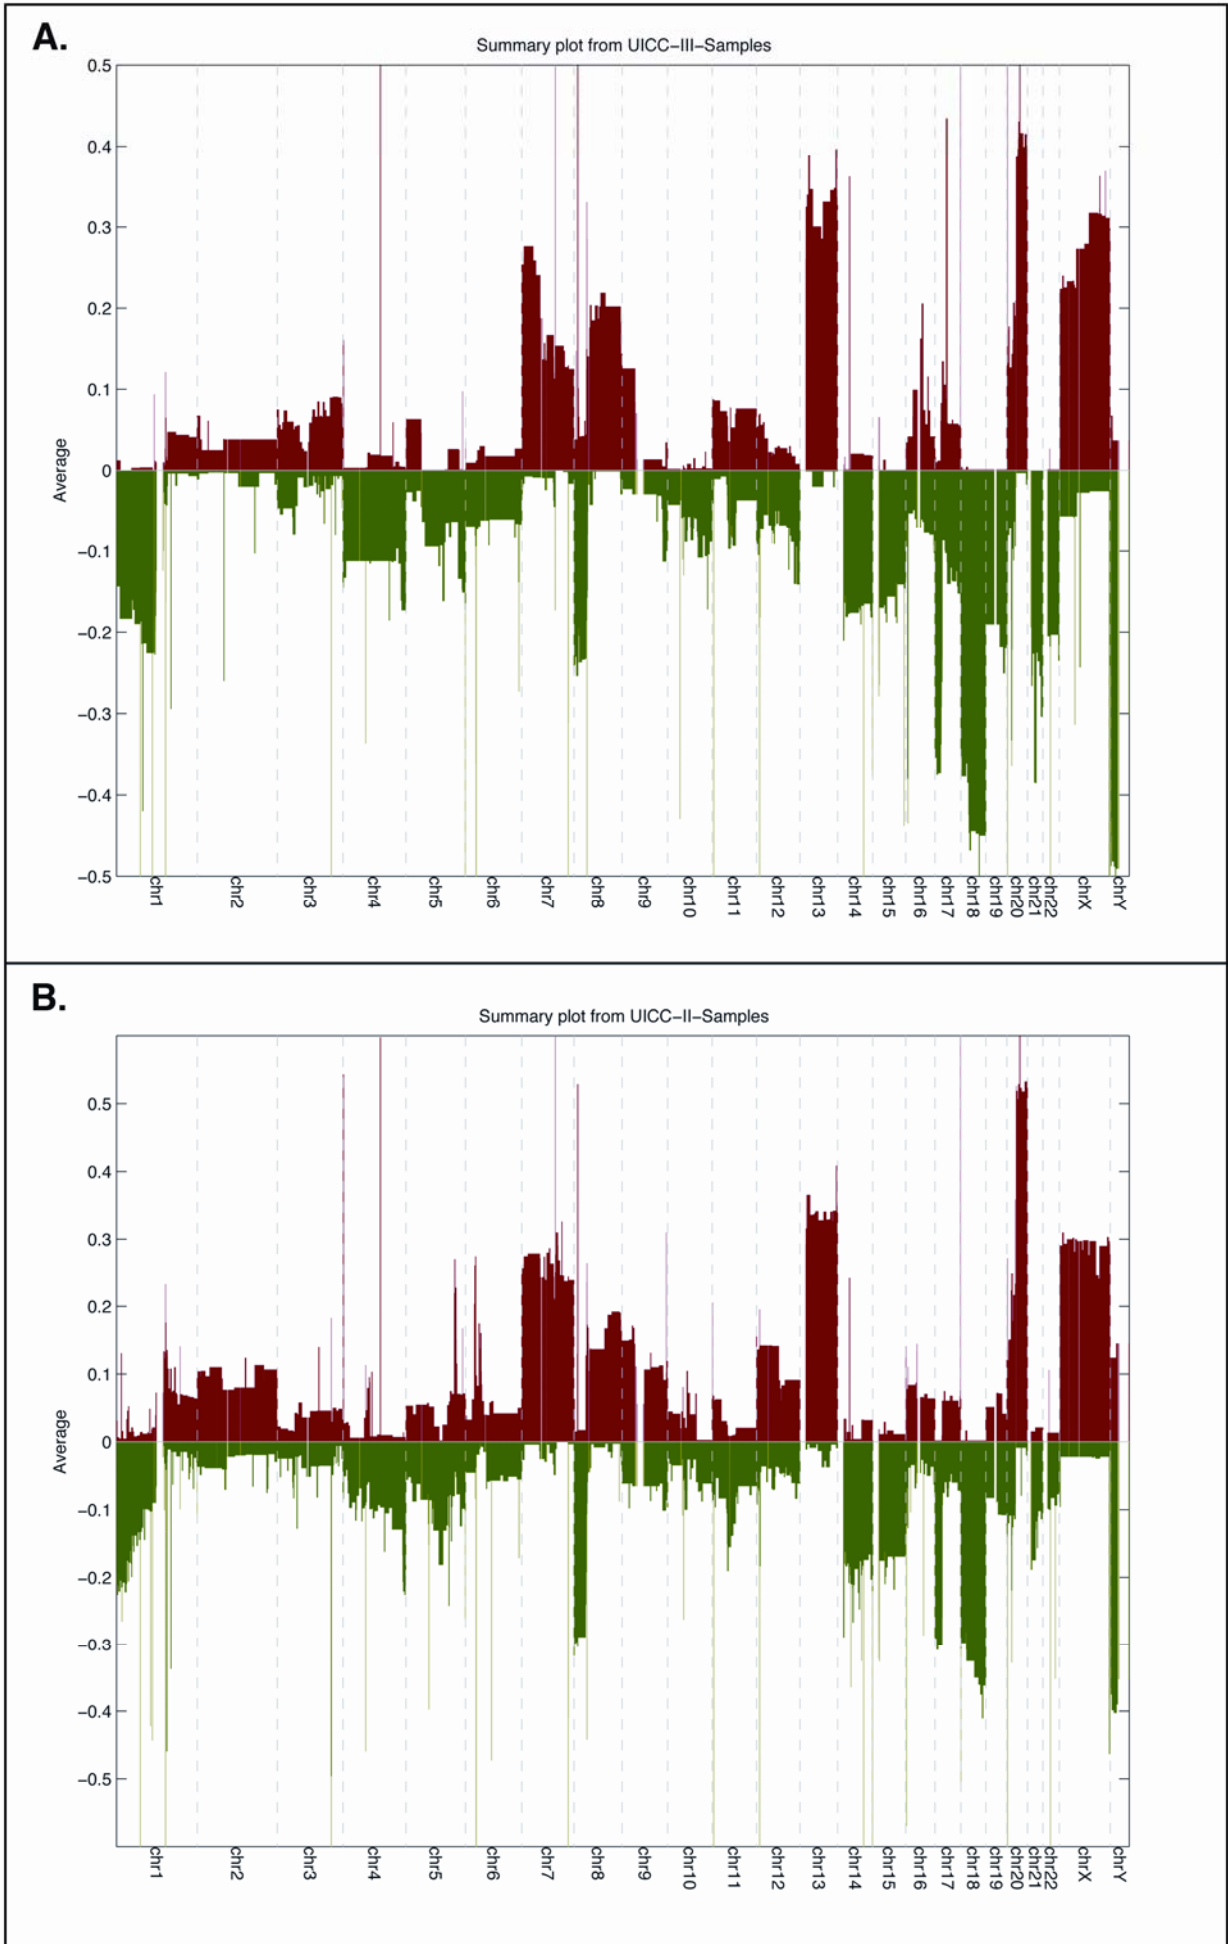

Supplement: NIHMS663082-supplement-Suppl_Fig_2.pdf [file NIHMS663082-supplement-Suppl_Fig_2.pdf]
